# Supplementary material for: A dose–response meta-analysis between serum concentration of 25-hydroxy vitamin D and risk of type 1 diabetes mellitus
Source: PubMed Central journal article supplement (PMC8266682; doi:10.1038/s41430-020-00813-1), 2020-11-24

Funnel plot with pseudo 95% confidence limits

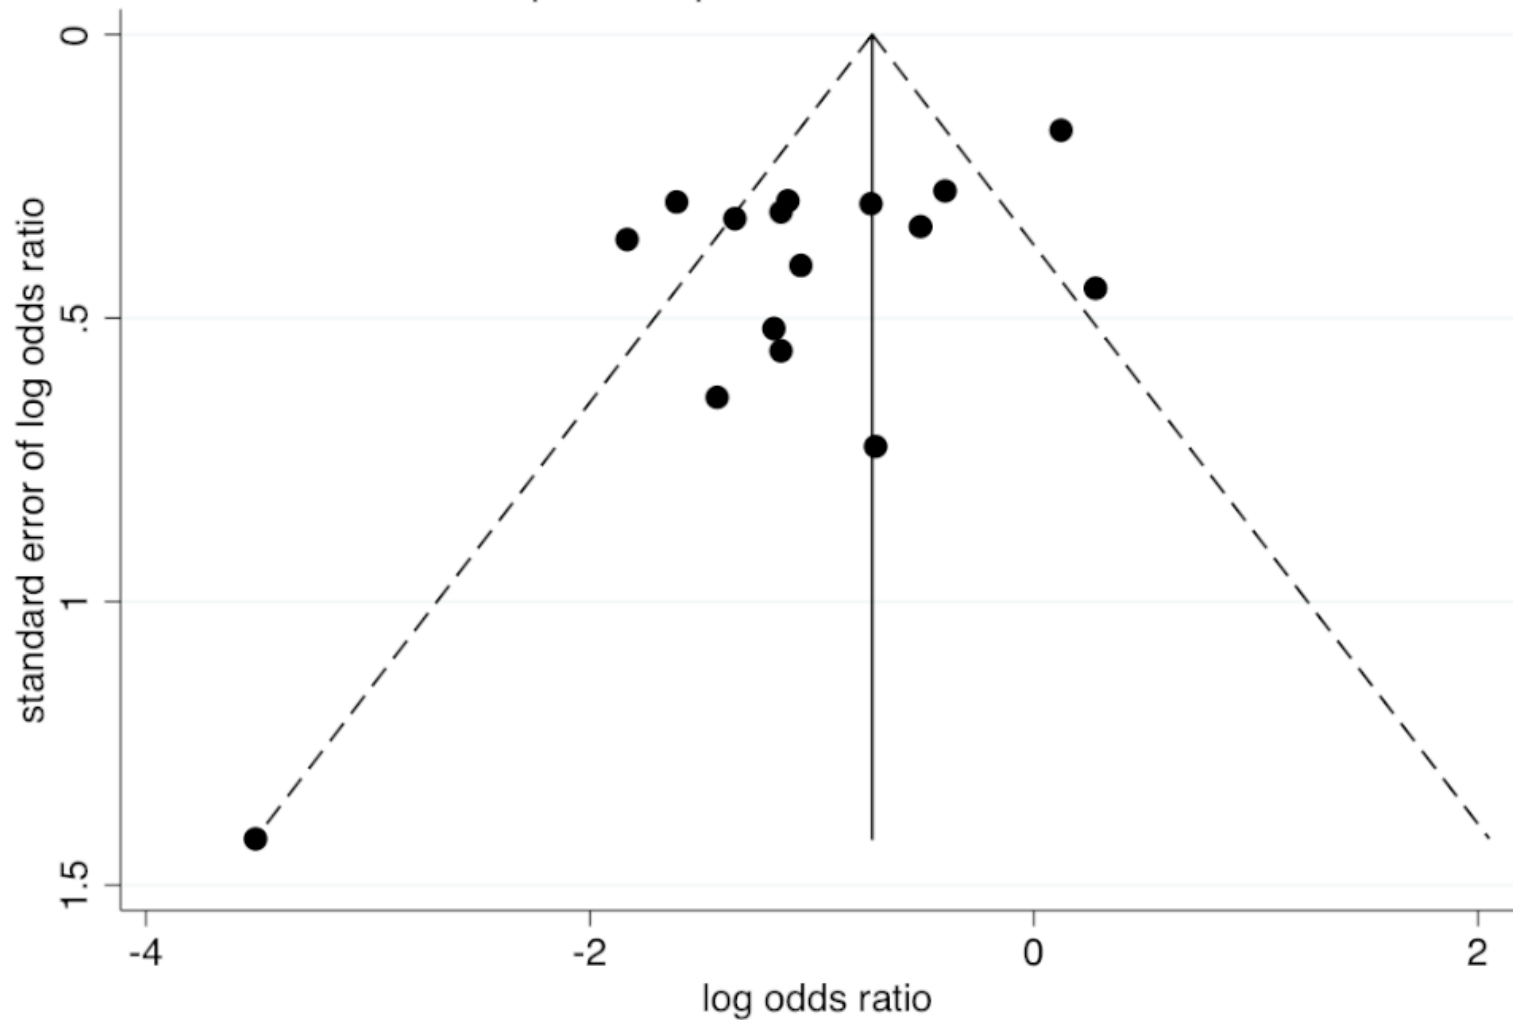

Supplement: 41430_2020_813_MOESM1_ESM.pdf [file 41430_2020_813_MOESM1_ESM.pdf]
